# High-density lipoprotein cholesterol does not predict future cardiovascular events in patients treated with statins for secondary prevention: an observation from the REAL-CAD study

T. Nagai<sup>1</sup>, I. Yokota<sup>1</sup>, K. Omote<sup>1</sup>, I. Sakuma<sup>2</sup>, Y. Nakagawa<sup>3</sup>, K. Kamiya<sup>1</sup>, T. Kimura<sup>4</sup>, R. Nagai<sup>5</sup>, T. Anzai<sup>1</sup>

<sup>1</sup>Hokkaido University, Sapporo, Japan; <sup>2</sup>Hokko Memorial Clinic, Sapporo, Japan; <sup>3</sup>Shiga University of Medical Science, Otsu, Japan; <sup>4</sup>Kyoto University Graduate School of Medicine, Kyoto, Japan; <sup>5</sup>Jichi Medical University, Tochigi, Japan

On behalf of The REAL-CAD study

**Funding Acknowledgement:** Type of funding source: Foundation. Main funding source(s): The Comprehensive Support Project for Clinical Research of Lifestyle-Related Disease of the Public Health Research Foundation

**Background:** The relation between high-density lipoprotein cholesterol (HDL-C) level after statin therapy and cardiovascular events in patients with stable coronary artery disease remains unclear.

**Purpose:** We sought to determine the association of the HDL-C level after statin therapy with cardiovascular events in stable coronary artery disease patients.

**Methods:** This study was a post-hoc analysis of the Randomized Evaluation of Aggressive or Moderate Lipid Lowering Therapy with Pitavastatin in Coronary Artery Disease (REAL-CAD) study, which is randomised, open-label, blinded endpoint, physician-initiated, superiority clinical trial. Enrollment was from January 2010 to March 2013, and follow-up was through January 2016. From the main study, we excluded the patients without either HDL-C data at baseline or 6 months, with occurrence of the primary outcome at 6 months and reported poor adherence for pitavastatin. The primary outcome of interest was a composite of cardiovascular death, non-fatal myocardial infarction, non-fatal ischemic stroke, or unstable angina requiring emergent admission after 6 months from randomisation, consistent with the primary analysis of the trial. We constructed landmark Cox proportional hazards regression models with the 18 selected clinically relevant risk-adjusting variables during the entire follow-up period starting at 6 months after randomisation. Absolute and relative changes of HDL-C level were defined as (6 months value – baseline value) and (absolute change / baseline value) × 100, respectively.

**Results:** Among 14,774 participants in the REAL-CAD study, 9,221 patients were included in this analysis (7652 [83.0%] male; median [IQR] age, 70 [63–75] years; median [IQR] HDL-C, 49 [42–57] mg/dL; median [IQR] low-density lipoprotein cholesterol [LDL-C], 88 [75–101] mg/dL). During a median follow-up period of 4.0 (IQR 3.2–4.7) years, the primary outcome occurred in 417 (4.5%) patients. There was no significant difference in crude and adjusted cumulative incidence of the primary outcome among the quartiles of HDL-C level at 6 months (Figure 1). The adjusted risks of all the HDL-C related variables (baseline value, 6 months value, absolute and relative changes) for the primary outcome were not significant (Figure 2). Furthermore, the adjusted hazard ratio (HR) as HDL-C level at 6 months increased by 10 mg/dL remained non-significant for the primary outcome for each on-treatment LDL-C level at 6 months (<70 mg/dL [HR 0.97, 95% CI 0.82–1.15], 70–100 mg/dL [HR 1.10, 95% CI 0.98–1.24], and ≥100 mg/dL [HR 0.94, 95% CI 0.78–1.13]). There was also no significant association between HDL-C level at 6 months and the primary outcome both in the low (1 mg/day [HR 1.02, 95% CI 0.91–1.14], increased by 10 mg/dL dose and high (4 mg/day [HR 1.04, 95% CI 0.91–1.19]) dose pitavastatin groups

**Conclusion:** After statin therapy with modestly controlled LDL-C, HDL-C level has little prognostic value in patients with stable coronary artery disease.

Figure 1. Landmark analysis

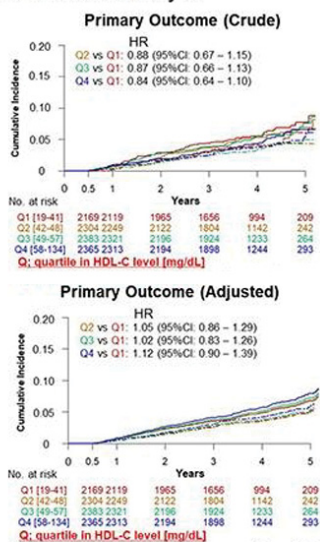

Dotted line; high dose pitavastatin group (4 mg/day).  
 Solid line; low dose pitavastatin group (1 mg/day).

Figure 2. Adjusted risks of HDL-C values for primary outcome

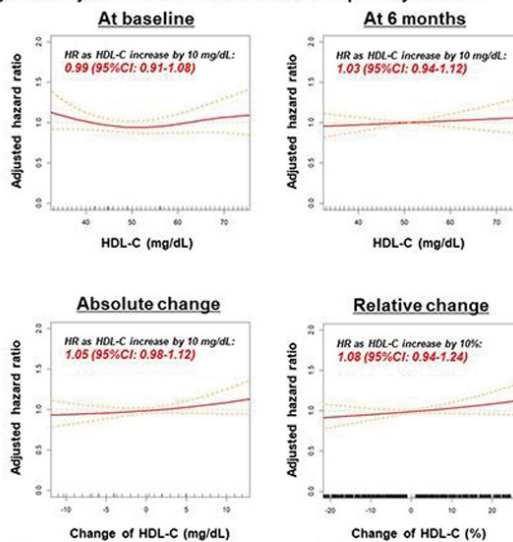

Red line; hazard ratio with penalised smoothing splines adjusted by covariates.  
 Dashed yellow line; its 95% confidence interval.
